# Supplementary material for: Rheumatoid arthritis T cell and muscle oxidative metabolism associate with exercise-induced changes in cardiorespiratory fitness
Source: PubMed Central journal article supplement (PMC9076829; doi:10.1038/s41598-022-11458-4), 2022-05-06
Supplement: 41598_2022_11458_MOESM1_ESM.pdf [file 41598_2022_11458_MOESM1_ESM.pdf]

**Rheumatoid arthritis T cell and muscle oxidative metabolism associate with exercise-induced changes in cardiorespiratory fitness**

Brian J. Andonian, MD, MHSc<sup>1,2\*</sup>, Alec Koss, BS<sup>2</sup>, Timothy R. Koves, PhD, MBA<sup>2</sup>, Elizabeth R. Hauser, PhD<sup>2</sup>, Monica J. Hubal, PhD<sup>3</sup>, David M. Pober, PhD<sup>4</sup>, Janet M. Lord, PhD<sup>5,6</sup>, Nancie J. MacIver, MD, PhD<sup>7</sup>, E. William St Clair, MD<sup>1</sup>, Deborah M. Muoio, PhD<sup>2</sup>, William E. Kraus, MD<sup>2</sup>, David B. Bartlett, PhD<sup>2,8#</sup>, Kim M. Huffman, MD/PhD<sup>1,2#</sup>

<sup>1</sup>Division of Rheumatology and Immunology, Duke University School of Medicine, Durham, NC 27701, USA.

<sup>2</sup>Duke Molecular Physiology Institute, Duke University School of Medicine, Durham, NC, 22701 USA.

<sup>3</sup>Department of Kinesiology, Indiana University-Purdue University Indianapolis School of Health & Human Sciences, Indianapolis, IN, 46202, USA

<sup>4</sup>Phastar Inc, Cambridge, MA, USA

<sup>5</sup>MRC-Versus Arthritis Centre for Musculoskeletal Ageing Research, Institute of Inflammation and Ageing, University of Birmingham, UK.

<sup>6</sup>NIHR Birmingham Biomedical Research Centre, University Hospital Birmingham and University of Birmingham, Birmingham, UK.

<sup>7</sup>Department of Pediatrics, University of North Carolina, Chapel Hill, NC, 27514 USA

<sup>8</sup>Faculty of Health and Medical Sciences, University of Surrey, Guildford, UK

\*Corresponding author and lead contact: [brian.andonian@duke.edu](mailto:brian.andonian@duke.edu)

#These authors contributed equally

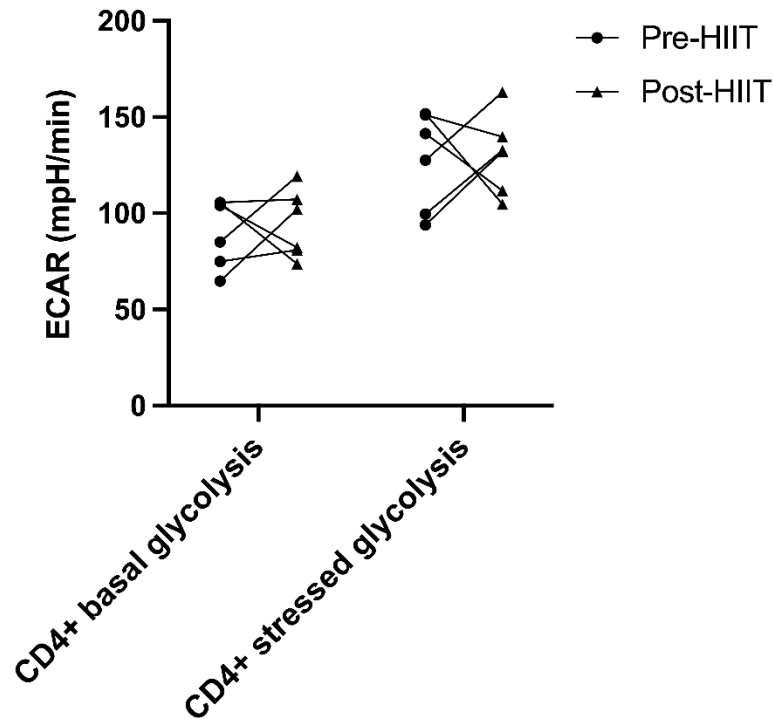

**Supplemental Figure 1. Changes in rheumatoid arthritis CD4+ T cell glycolytic function following high-intensity interval training.** Graphs show changes from before (Pre-HIIT) to after (Post-HIIT) high-intensity interval training (HIIT) in individual rheumatoid arthritis (RA) participant peripheral CD4+ T cell basal and stressed (peak value during Seahorse Mito Stress Test) extracellular acidification rate (ECAR).  $p > 0.05$  for Pre-HIIT versus Post-HIIT paired t tests.

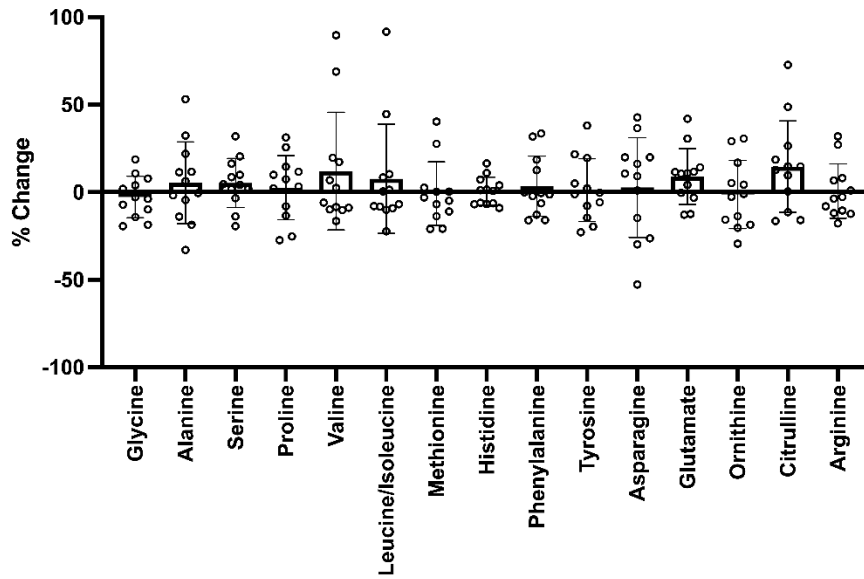

Plasma amino acids

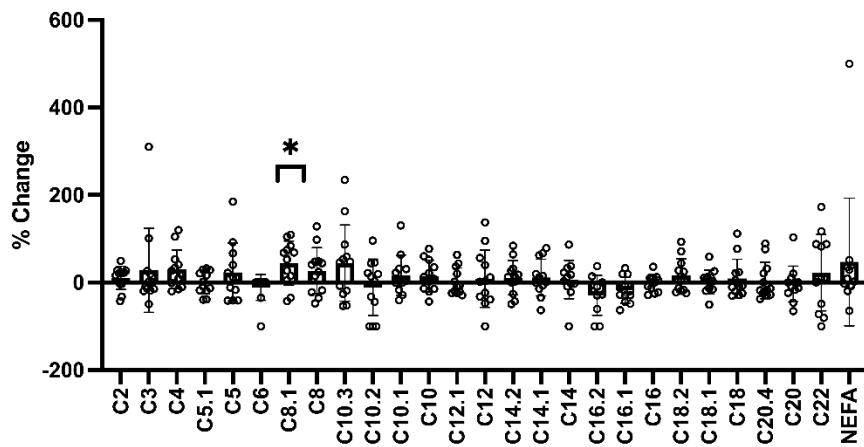

Plasma acylcarnitines and NEFAs

**Supplemental Figure 2. Rheumatoid arthritis plasma metabolite changes after high-intensity interval training.** A) Graphs show percent changes in individual rheumatoid arthritis (RA) plasma amino acid concentrations following high-intensity interval training (HIIT) data as dot plots with means (box) and SD (whiskers). B) Graphs show percent changes in RA plasma acylcarnitine and non-esterified fatty acid concentrations following HIIT data as dot plots with means (box) and SD (whiskers). \*  $p < 0.05$  (without multiple testing correction) for RA plasma metabolite concentrations before HIIT versus after HIIT paired t tests.  
m Muscle, c Acylcarnitine, NEFA Non-esterified fatty acids

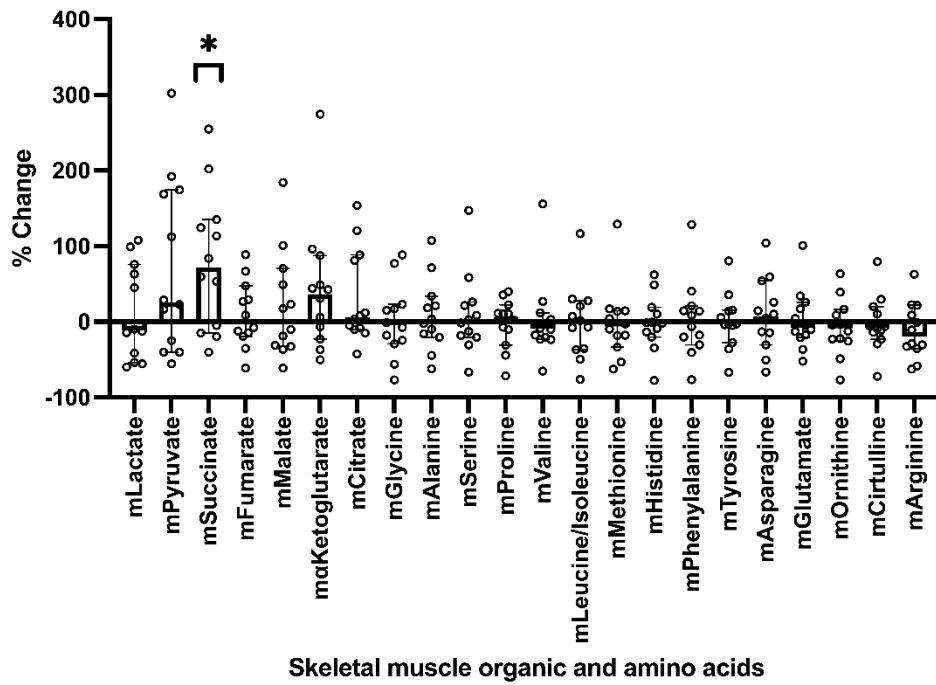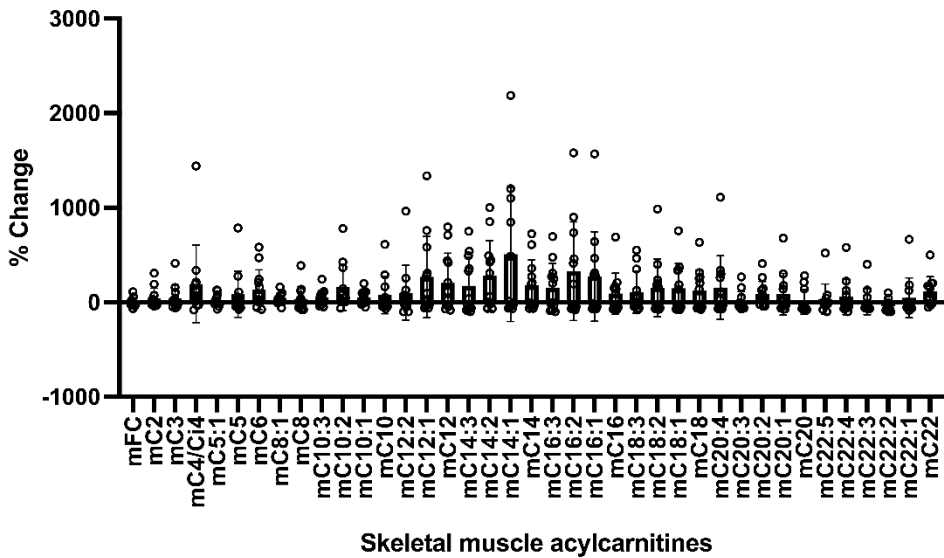

**Supplemental Figure 3. Rheumatoid arthritis skeletal muscle metabolite changes after high-intensity interval training.** A) Graphs show percent changes in individual rheumatoid arthritis (RA) skeletal muscle organic acid and amino acid concentrations following high-intensity interval training (HIIT) data as dot plots with means (box) and SD (whiskers). B) Graphs show percent changes in individual RA skeletal muscle acylcarnitine concentrations following HIIT data as dot plots with means (box) and SD (whiskers). \* $p < 0.05$  (without multiple testing correction) for RA skeletal muscle metabolite concentrations before HIIT versus after HIIT paired t test. m Muscle, C Acylcarnitine

**Supplementary Table 1. KEGG molecule list for gene expression analyses**

| KEGG pathway category                  | Molecules                                                                                                                                                                                                                                                                                                                                                                                                                                                                                                                                                                                                                                                                                                                                                                                                                                                                                                                                   |
|----------------------------------------|---------------------------------------------------------------------------------------------------------------------------------------------------------------------------------------------------------------------------------------------------------------------------------------------------------------------------------------------------------------------------------------------------------------------------------------------------------------------------------------------------------------------------------------------------------------------------------------------------------------------------------------------------------------------------------------------------------------------------------------------------------------------------------------------------------------------------------------------------------------------------------------------------------------------------------------------|
| Fatty Acid Metabolism                  | ACAA1, Acaa1b, ACAA2, ACAD10, ACAD11, ACAD8, ACADL, ACADM, ACADS, ACADSB, ACADVL, ACAT1, ACAT2, ACOX1, ACOX2, ACOX3, ACSBG1, ACSBG2, ACSL1, ACSL3, ACSL4, ACSL5, ACSL6, ADH1A, ADH1B, ADH1C, ADH4, ADH5, ADH6, Adh6a, ADH7, ADHFE1, AKR1A1, AKR1D1, ALDH1A1, ALDH1A2, ALDH1A3, ALDH1B1, ALDH2, ALDH3A1, ALDH3A2, ALDH4A1, ALDH7A1, ALDH9A1, Aldr5, AUH, CPT1A, CPT1B, CPT1C, CPT2, CYP19A1, CYP1A1, CYP1A2, CYP1B1, Cyp2b23, CYP2B6, Cyp2c23, Cyp2c70, CYP2C8, Cyp2d1/Cyp2d5, Cyp2d22, Cyp2d26, CYP2E1, CYP2F1, CYP2J2, Cyp2j5, CYP2S1, CYP2U1, CYP3A4, CYP3A5, CYP4A11, Cyp4a14, CYP4A22, CYP4B1, CYP4F11, CYP4F12, CYP4F2, CYP4F8, CYP4X1, CYP4Z1, CYP51A1, DHODH, DHRS9, ECHS1, ECI1, ECI2, EHHADH, GCDH, HADH, HADHA, HSD17B10, HSD17B4, HSD17B8, IVD, POR, SDHA, SDHB, SDHD, SDS, SLC27A1, SLC27A2, SLC27A3, SLC27A4, SLC27A5, SLC27A6, SRD5A1, SRD5A2, SRD5A3                                                                         |
| Oxidative Phosphorylation              | ATP12A, ATP4A, ATP4B, ATP5F1A, ATP5F1B, ATP5F1C, ATP5F1D, ATP5MC3, ATP5MF, ATP5PB, ATP5PF, ATP6AP1, ATP6V0A1, ATP6V0A2, ATP6V0A4, ATP6V0B, ATP6V0D1, ATP6V0D2, ATP6V0E1, ATP6V0E2, ATP6V1A, ATP6V1B1, ATP6V1B2, ATP6VIC1, ATP6VIC2, ATP6VID, ATP6V1E1, ATP6V1E2, ATP6V1F, ATP6V1G1, ATP6V1G2, ATP6V1G3, ATP6V1H, ATP7A, COX10, COX11, COX15, COX4I1, COX4I2, COX5A, COX6A1, COX6A2, COX6B1, COX6B2, COX7A1, COX7B, COX7B2, Cox7b2, COX8A, Cox8b, CYB5A, LHPP, MT-ATP6, mt-Atp8, MT-ATP8, MT-CO1, MT-CO2, MT-CO3, MT-CYB, MT-ND1, MT-ND2, MT-ND3, MT-ND4, MT-ND5, MT-ND6, NDUFA1, NDUFA11, NDUFA12, NDUFA13, NDUFA2, NDUFA3, NDUFA4, NDUFA4L2, NDUFA5, NDUFA6, NDUFA8, NDUFA9, NDUFB1, NDUFB10, NDUFB11, NDUFB2, NDUFB5, NDUFB6, NDUFB7, NDUFB8, NDUFB9, NDUFC1, NDUFC2, NDUFS1, NDUFS2, NDUFS4, Ndufs6, NDUFS6, NDUFS7, NDUFS8, NDUFV1, NDUFV2, NDUFV3, PPA1, PPA2, SDHA, SDHB, SDHC, SDHD, SURF1, TCIRG1, UQCRC1, UQCRC2, UQCRCFS1, UQCRCQ |
| Pyruvate Metabolism                    | ACACA, ACACB, ACAT1, ACAT2, ACMSD, ACOT12, ACSL1, ACSL3, ACSS1, ACSS2, ACSS3, ACYP1, ACYP2, ADH4, AKR1A1, AKR1B1, Akr1b7, AKR1C1/AKR1C2, AKR1C3, AKR1C4, AKR7A2, AKR7A3, ALDH1A1, ALDH1A2, ALDH1A3, ALDH1B1, ALDH2, ALDH3A1, ALDH3A2, ALDH4A1, ALDH7A1, ALDH9A1, Aldr2, Aldr3, Aldr4, AMD1, AZIN2, BCKDHA, BCKDHB, CLYBL, CSAD, DBT, DDC, DLAT, DLD, ECHDC1, GAD1, GAD2, GLO1, GOT1, GRHPR, HADHA, HAGH, HDC, HMGCL, HMGCLL1, HOGA1, ILVBL, LDHAL6A, LDHAL6B, LDHB, LDHC, LDHD, LIPF, LOC100362738, MDH1, MDH2, ME1, ME2, ME3, MLYCD, MVD, MYO5B, NANS, NPL, ODC1, PAICS, PC, PCK1, PCK2, PDHA1, PDHB, PISD, PKLR, PKM, PPCDC, UMPS, URAD, UROD, UXS1                                                                                                                                                                                                                                                                                       |
| Valine, Leucine, Isoleucine Metabolism | ABAT, ACAA1, Acaa1b, ACAA2, ACAD10, ACAD11, ACAD8, ACADL, ACADM, ACADS, ACADSB, ACADVL, ACAT1, ACAT2, ADH7, AGXT2, AKR1D1, ALDH1A1, ALDH1A2, ALDH1A3, ALDH1B1, ALDH2, ALDH3A1, ALDH3A2, ALDH4A1, ALDH6A1, ALDH7A1, ALDH9A1, AOX1, Aox3, Aox4, AUH, BCAT1, BCAT2, BCKDHA, BCKDHB, DBT, DHODH, DLD, ECHS1, EHHADH, GCDH, HADH, HADHA, HIBADH, HIBCH, HMGCL, HMGCLL1, HMGCS1, HMGCS2, HSD17B10, HSD17B4, HSD17B8, IL4I1, IVD, Lao1, MCCC1, MCCC2, MCEE, MMUT, OXCT1, PCCA, PCCB, SDHA, SDHB, SDHD, SDS, SRD5A1, SRD5A2, SRD5A3                                                                                                                                                                                                                                                                                                                                                                                                                 |
| TCA Cycle                              | ACAA1, Acaa1b, ACAA2, ACAD10, ACAD11, ACAD8, ACADL, ACADM, ACADS, ACADSB, ACADVL, ACAT1, ACAT2, ACOX1, ACOX2, ACOX3, ACSBG1, ACSBG2, ACSL1, ACSL3, ACSL4, ACSL5, ACSL6, ADH1A, ADH1B, ADH1C, ADH4, ADH5, ADH6, Adh6a, ADH7, ADHFE1, AKR1A1, AKR1D1, ALDH1A1, ALDH1A2, ALDH1A3, ALDH1B1, ALDH2, ALDH3A1, ALDH3A2, ALDH4A1, ALDH7A1, ALDH9A1, Aldr5, AUH, CPT1A, CPT1B, CPT1C, CPT2, CYP19A1, CYP1A1, CYP1A2, CYP1B1, Cyp2b23, CYP2B6, Cyp2c23, Cyp2c70, CYP2C8, Cyp2d1/Cyp2d5, Cyp2d22, Cyp2d26, CYP2E1, CYP2F1, CYP2J2, Cyp2j5, CYP2S1, CYP2U1, CYP3A4, CYP3A5, CYP4A11, Cyp4a14, CYP4A22, CYP4B1, CYP4F11, CYP4F12, CYP4F2, CYP4F8, CYP4X1, CYP4Z1, CYP51A1, DHODH, DHRS9, ECHS1, ECI1, ECI2, EHHADH, GCDH, HADH, HADHA, HSD17B10, HSD17B4, HSD17B8, IVD, POR, SDHA, SDHB, SDHD, SDS, SLC27A1, SLC27A2, SLC27A3, SLC27A4, SLC27A5, SLC27A6, SRD5A1, SRD5A2, SRD5A3                                                                         |
| Glutamate and Glutamine Metabolism     | GLS, GLS2, GLUD1, GLUD2                                                                                                                                                                                                                                                                                                                                                                                                                                                                                                                                                                                                                                                                                                                                                                                                                                                                                                                     |

**Supplementary Table 2. Significant changes in rheumatoid arthritis skeletal muscle gene expression following high-intensity interval training (p<0.05)**

| Gene ID                                                                             | Gene name                                                   | KEGG pathway                                                                     | Fold change (Post vs Pre) | p-value (ANCOVA) |
|-------------------------------------------------------------------------------------|-------------------------------------------------------------|----------------------------------------------------------------------------------|---------------------------|------------------|
| <i>Molecules significantly increased following high-intensity interval training</i> |                                                             |                                                                                  |                           |                  |
| BCKDHB                                                                              | 2-oxoisovalerate dehydrogenase subunit beta                 | Pyruvate Metabolism, Valine/Leucine/Isoleucine Metabolism                        | 1.033                     | 0.011            |
| HSD17B10                                                                            | 3-hydroxyacyl-CoA dehydrogenase type-2                      | Fatty Acid Metabolism, Valine/Leucine/Isoleucine Metabolism                      | 1.121                     | 0.012            |
| NDUFB6                                                                              | NADH dehydrogenase [ubiquinone] 1 beta subcomplex subunit 6 | Oxidative Phosphorylation                                                        | 1.137                     | 0.012            |
| ACSL1                                                                               | Long-chain-fatty-acid--CoA ligase 1                         | Fatty Acid Metabolism, Pyruvate Metabolism                                       | 1.161                     | 0.021            |
| BCAT2                                                                               | Branched-chain-amino-acid aminotransferase                  | Valine/Leucine/Isoleucine Metabolism                                             | 1.081                     | 0.030            |
| ATP5MF                                                                              | ATP synthase subunit f                                      | Oxidative Phosphorylation                                                        | 1.136                     | 0.033            |
| PKLR                                                                                | Pyruvate kinase                                             | Pyruvate Metabolism                                                              | 1.033                     | 0.033            |
| HSD17B8                                                                             | Estradiol 17-beta-dehydrogenase 8                           | Fatty Acid Metabolism, Valine/Leucine/Isoleucine Metabolism                      | 1.089                     | 0.036            |
| ATP6V1F                                                                             | V-type proton ATPase subunit F                              | Oxidative Phosphorylation                                                        | 1.172                     | 0.045            |
| <i>Molecules significantly decreased following high-intensity interval training</i> |                                                             |                                                                                  |                           |                  |
| ATP4B                                                                               | Potassium-transporting ATPase subunit beta                  | Oxidative Phosphorylation                                                        | -1.030                    | 0.001            |
| OGDH                                                                                | 2-oxoglutarate dehydrogenase                                | TCA cycle                                                                        | -1.033                    | 0.003            |
| LDHC                                                                                | L-lactate dehydrogenase C chain                             | Pyruvate Metabolism                                                              | -1.043                    | 0.009            |
| ALDH6A1                                                                             | Methylmalonate-semialdehyde dehydrogenase                   | Valine/Leucine/Isoleucine Metabolism                                             | -1.084                    | 0.028            |
| ALDH9A1                                                                             | 4-trimethylaminobutyraldehyde dehydrogenase                 | Fatty Acid Metabolism, Pyruvate Metabolism, Valine/Leucine/Isoleucine Metabolism | -1.091                    | 0.012            |
| CYP4Z1                                                                              | Cytochrome P450 4Z1                                         | Fatty Acid Metabolism                                                            | -1.030                    | 0.023            |
| ATP6V0A2                                                                            | V-type proton ATPase 116 kDa subunit a2                     | Oxidative Phosphorylation                                                        | -1.036                    | 0.035            |
| COX6B2                                                                              | Cytochrome c oxidase subunit 6B2                            | Oxidative Phosphorylation                                                        | -1.045                    | 0.039            |
| TCIRG1                                                                              | V-type proton ATPase 116 kDa subunit a3                     | Oxidative Phosphorylation                                                        | -1.043                    | 0.040            |
